# Supplementary material for: Single-cell analysis of intestinal epithelial organoids reveals aging-associated differentiation delay conserved between in vivo and ex vivo
Source: Research Square preprint supplement (doi:10.21203/rs.3.rs-8093838/v1), 2025-11-28
Supplement: Supplementary file 1 [file 85a1919674f2f95f976c75b4.docx]

**Supplementary Table 1 Primer sequences.**

| Gene | Sequence | |
| --- | --- | --- |
| *Gapdh* | Forward | 5’-TTTGGCATTGTGGAAGGGCTC-3’ |
| Reverse | 5’-CAGCTTTCCAGAGGGGCCAT-3’ |
| *Lgr5* | Forward | 5’-CAGGTCAATACCGGAGCGAG-3’ |
| Reverse | 5’-GCGAGGCACCATTCAAAGTC-3’ |
| *Mki67* | Forward | 5’-TCCAGCTGCCTGTAGTGTCA-3’ |
| Reverse | 5’-TCCATGTCTCAGCCTCACAG-3’ |
| *Alpi* | Forward | 5’-CAGAACCTGGTGCAAACGTG-3’ |
| Reverse | 5’-TTCCAAACATACCGGGCTCC-3’ |
| *Slc2a2* | Forward | 5’-TCCCTTGGTTCATGGTTGCT-3’ |
| Reverse | 5’-GAACACGTAAGGCCCAAGGA-3’ |
| *Lyz1* | Forward | 5’-ATGGCTACCGTGGTGTCAAG-3’ |
| Reverse | 5’-CGGTCTCCACGGTTGTAGTT-3’ |
| *Muc2* | Forward | 5’-TCCTGACCAAGAGCGAACAC-3’ |
| Reverse | 5’-ACAGCACGACAGTCTTCAGG-3’ |
| *Chga* | Forward | 5’-ACCAAGGTGATGAAGTGCGT-3’ |
| Reverse | 5’-AGGGTCTCCAGACACTCAGG-3’ |
| *Dclk1* | Forward | 5’-CCAGAGATTTTCAGCCGTGC-3’ |
| Reverse | 5’-AGCGGTGGTTGCTATTACAGA-3’ |
